# Supplementary material for: The superior performance of a Pt catalyst supported on nanoporous SiC–C composites for liquid-phase selective hydrogenation of cinnamaldehyde
Source: Royal Society of Chemistry journal article supplement (doi:10.1039/c6ra15164g), 2016-01-01
Supplement: c6ra15164g1.pdf [file c6ra15164g1.pdf]

## Supporting Information

### Superior performance of Pt catalyst supported on nanoporous SiC-C composites for liquid-phase selective hydrogenation of cinnamaldehyde

Ruihua Yao, Junrui Li, Peng Wu and Xiaohong Li\*

Shanghai Key Laboratory of Green Chemistry and Chemical Processes, School of Chemistry and Molecular Engineering, East China Normal University, 3663 North Zhongshan Road, Shanghai 200062

E-mail: xhli@chem.ecnu.edu.cn

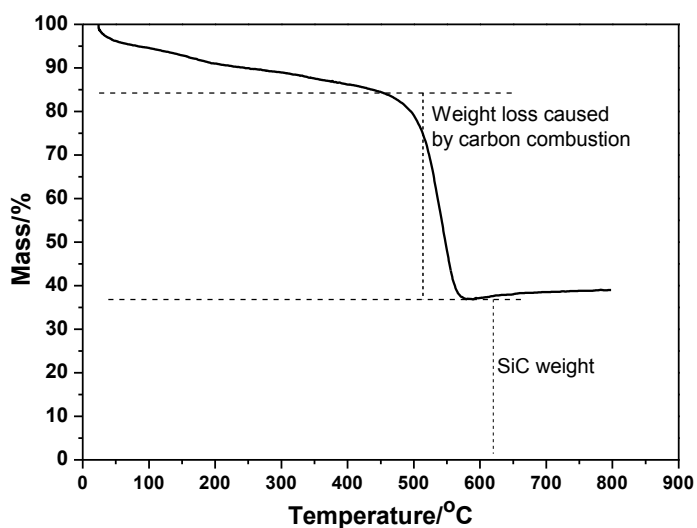

**Figure S1.** TG profile of nanoporous SiC-C composites from r.t. to 800 °C under air atmosphere.

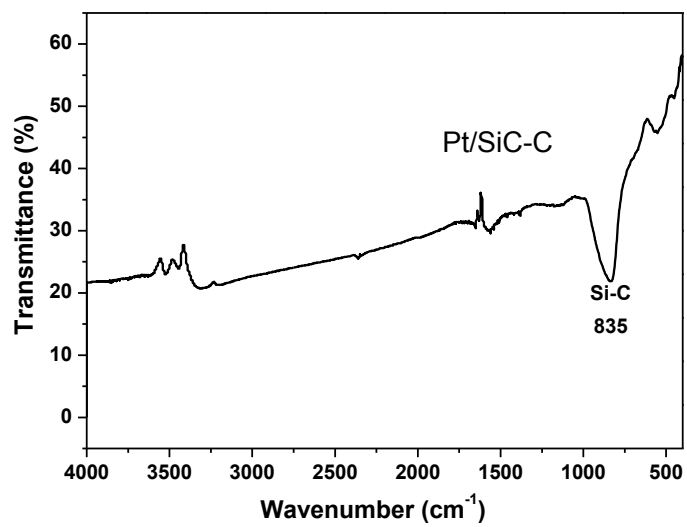

**Figure S2.** Infrared spectrum of nanoporous SiC-C composites.

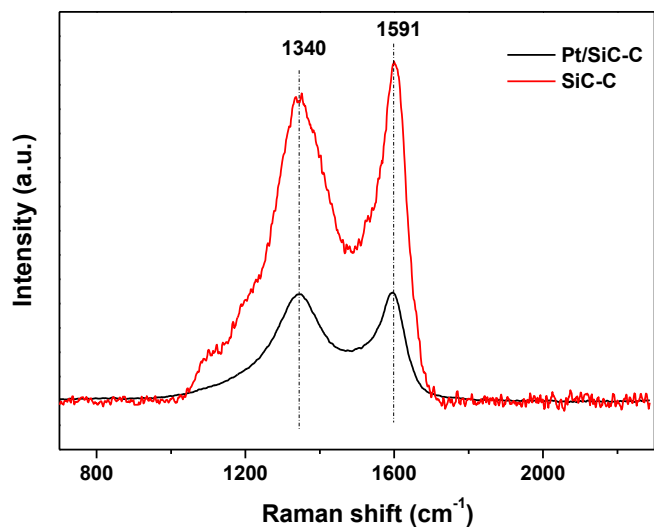

**Figure S3.** Raman spectra of nanoporous SiC-C composites and Pt/SiC-C catalyst excited using a 514 nm laser.

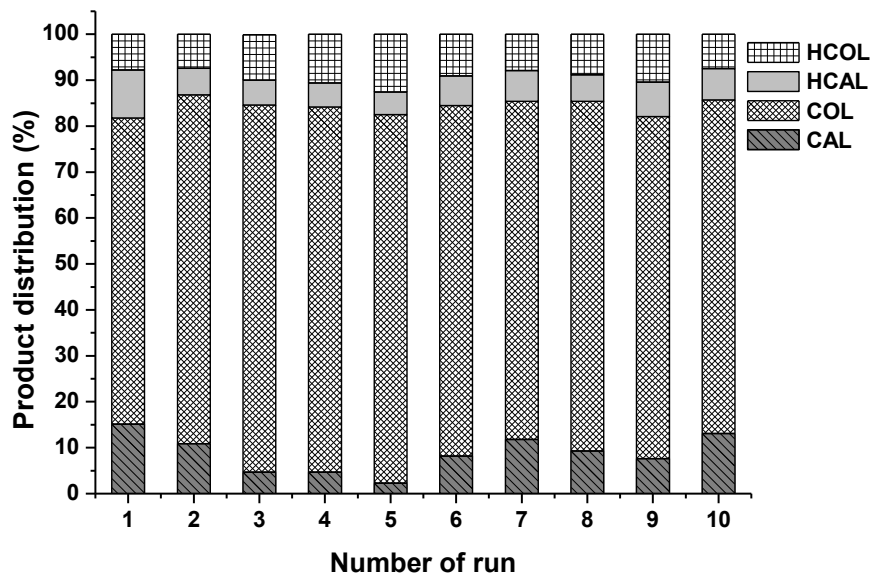

**Figure S4.** Product distribution *VS* reaction runs for the liquid-phase hydrogenation of CAL at room temperature with the Pt/SiC-C catalyst. Reaction conditions: 0.03 g Pt/SiC-C catalyst, 20 mL solvent (18 mL isopropanol and 2 mL water), 960  $\mu$ L CAL, 2.0 MPa H<sub>2</sub>, 25 °C, 1200 rpm, 1 h.
